# Supplementary material for: The PERK/ATF4 pathway is required for metabolic reprogramming and progressive lung fibrosis
Source: JCI journal article supplement (doi:10.1172/jci.insight.189330), 2025-04-10

Full unedited gel for Figure 1A

p-PERK

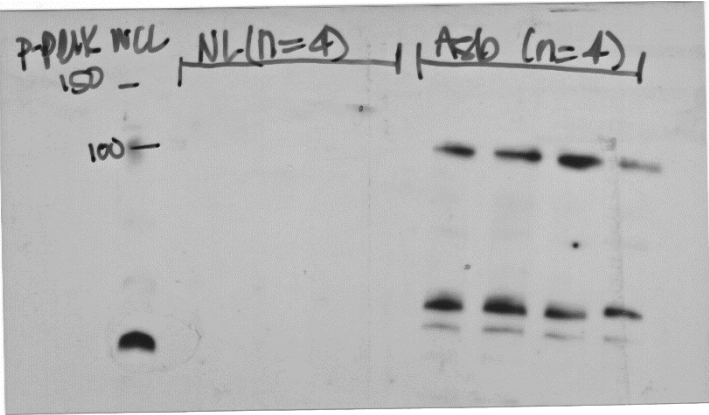

PERK

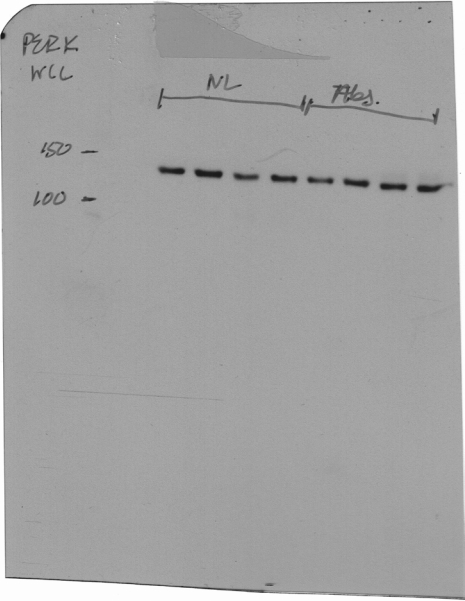

p-eIF2α

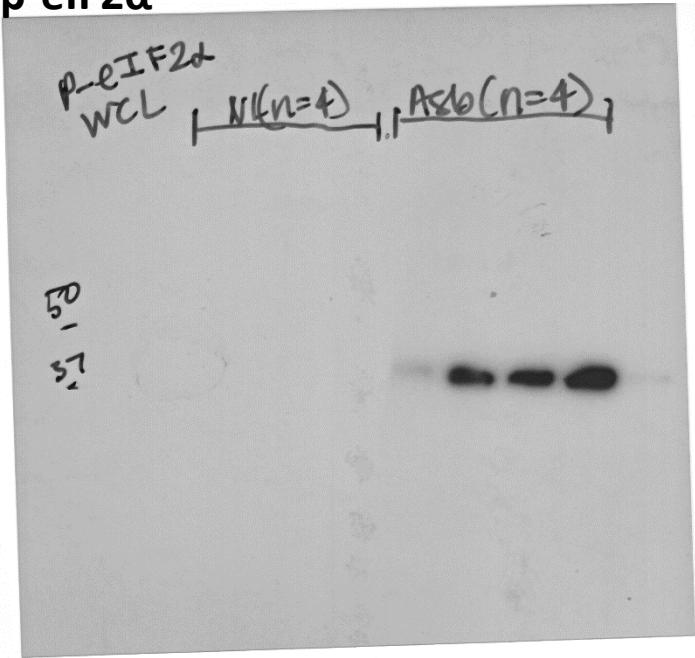

eIF2α

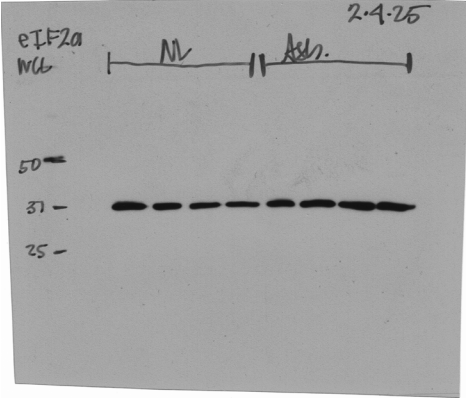

p-IRE1α

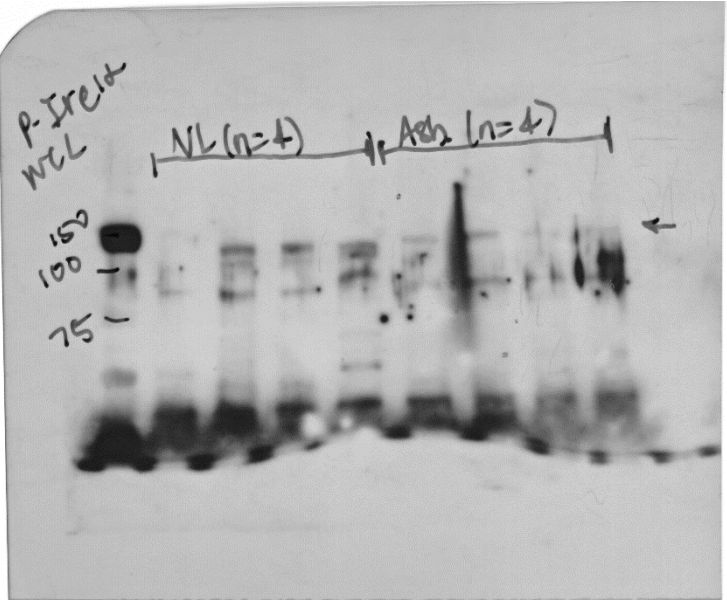

IRE1α

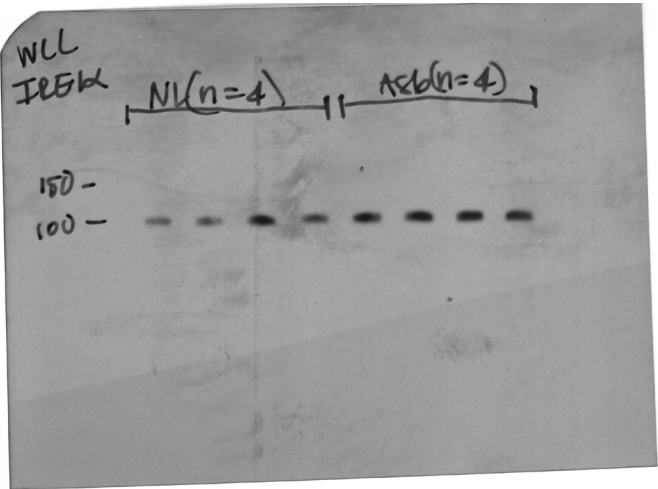

β-actin

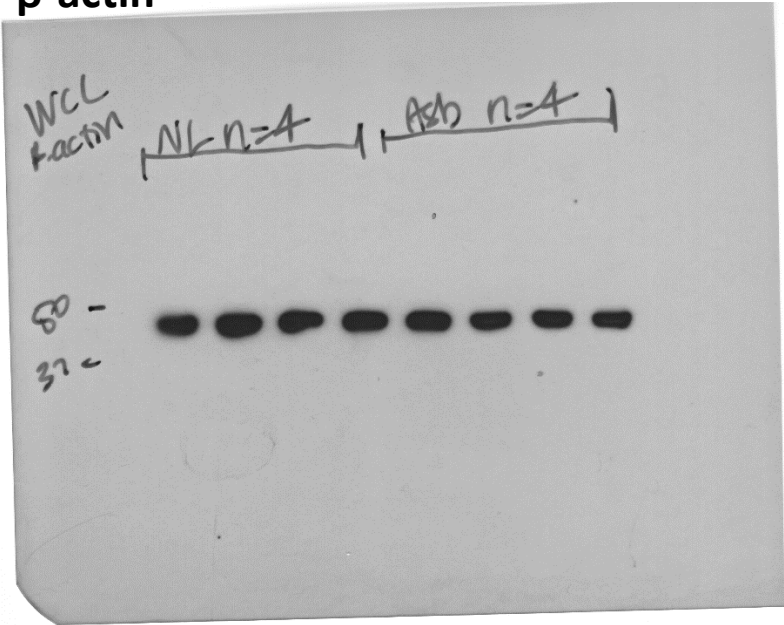

Full unedited gel for Figure 1E

p-PERK

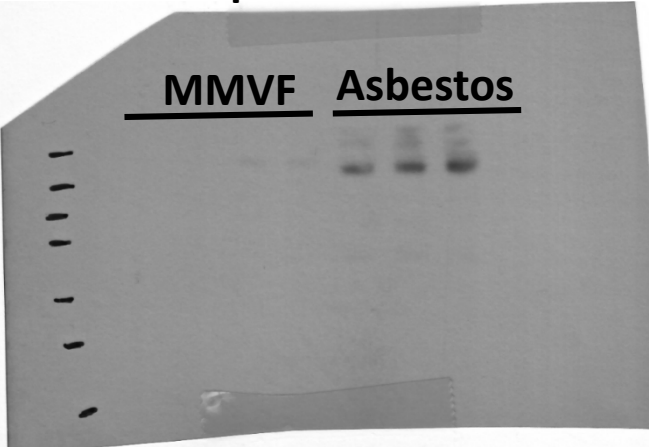

PERK

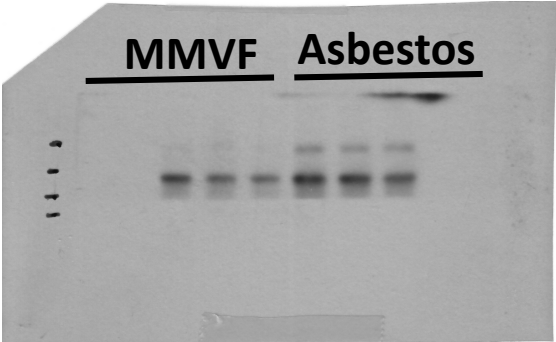

p-IRE1α

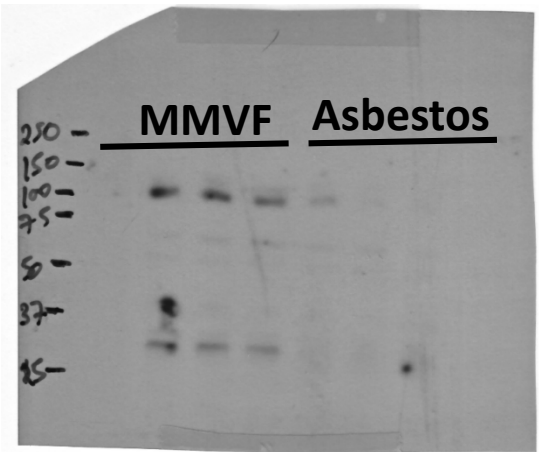

IRE1α

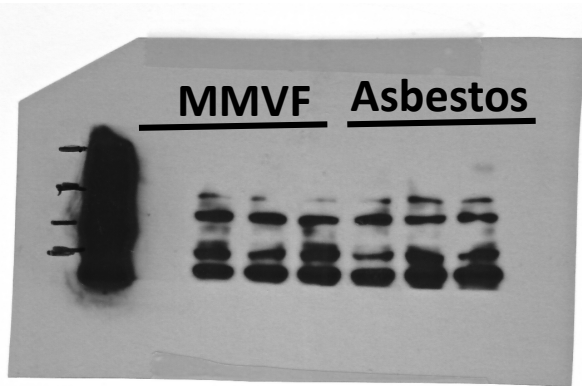

p-eIF2α

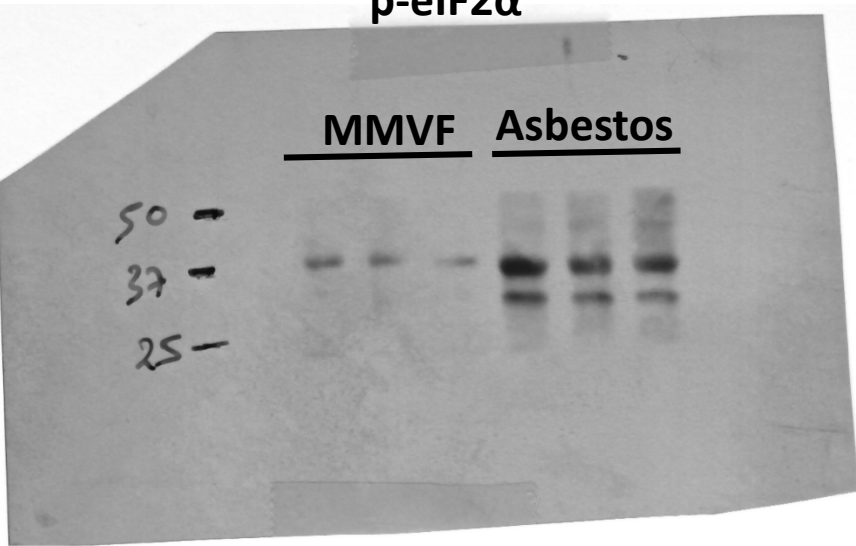

eIF2α

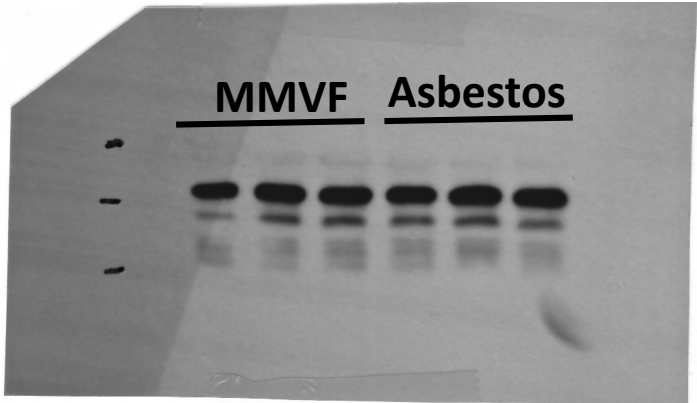

β-actin

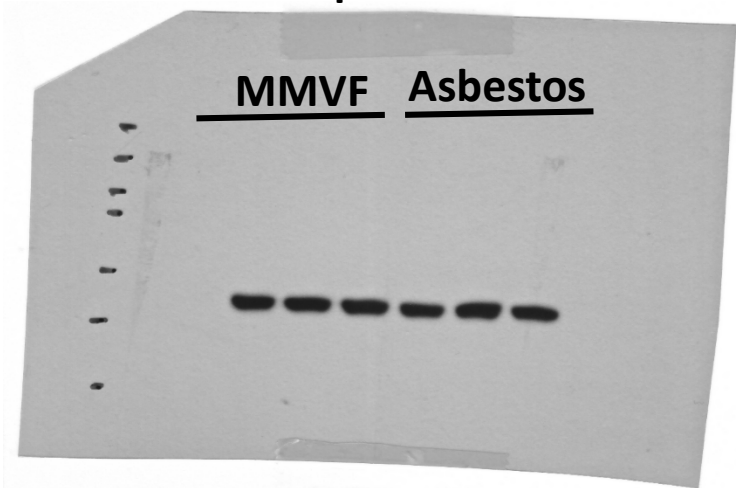

Full unedited gel for Figure 1I

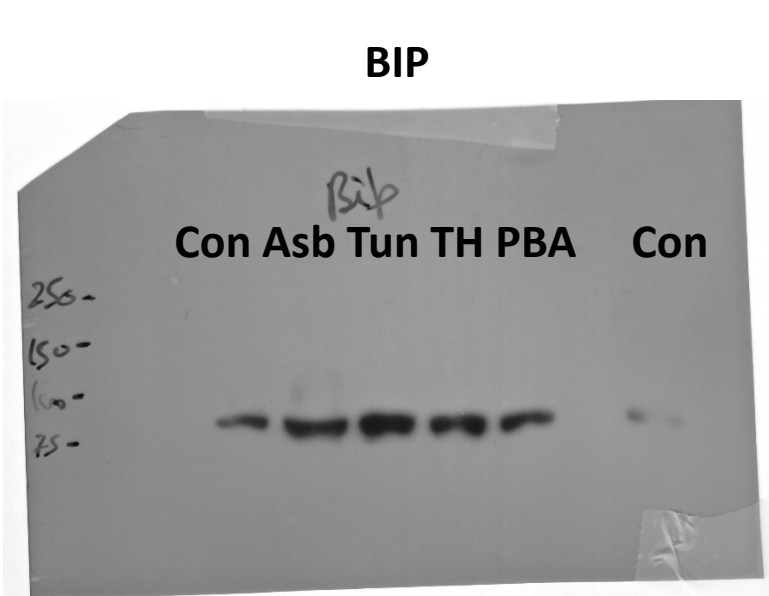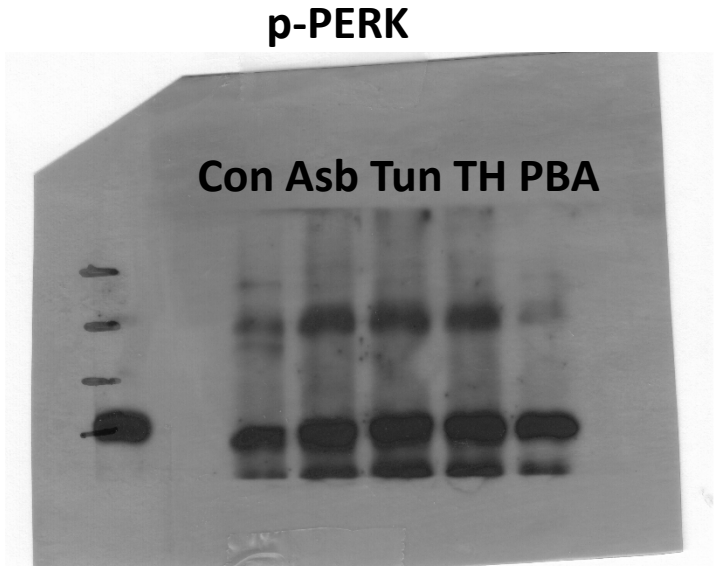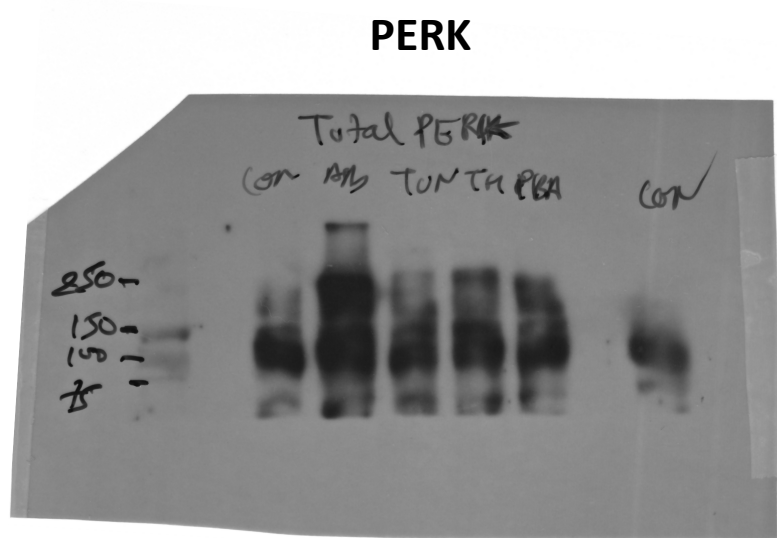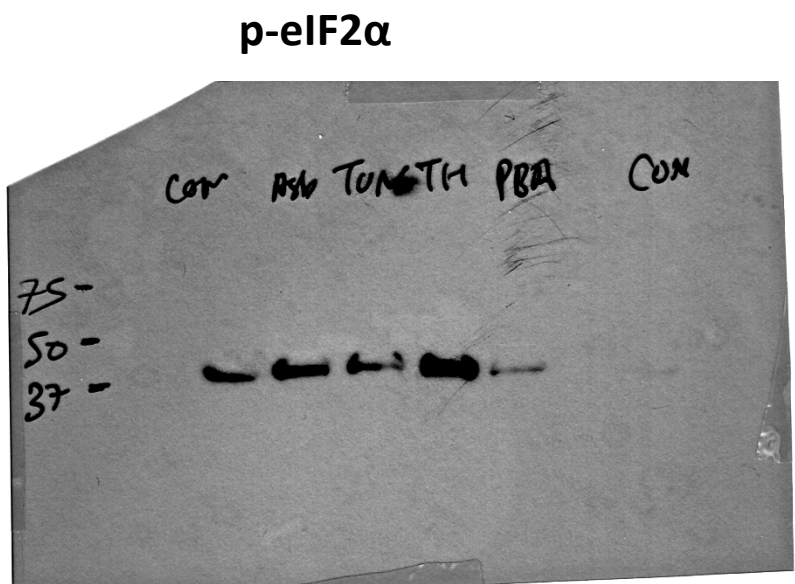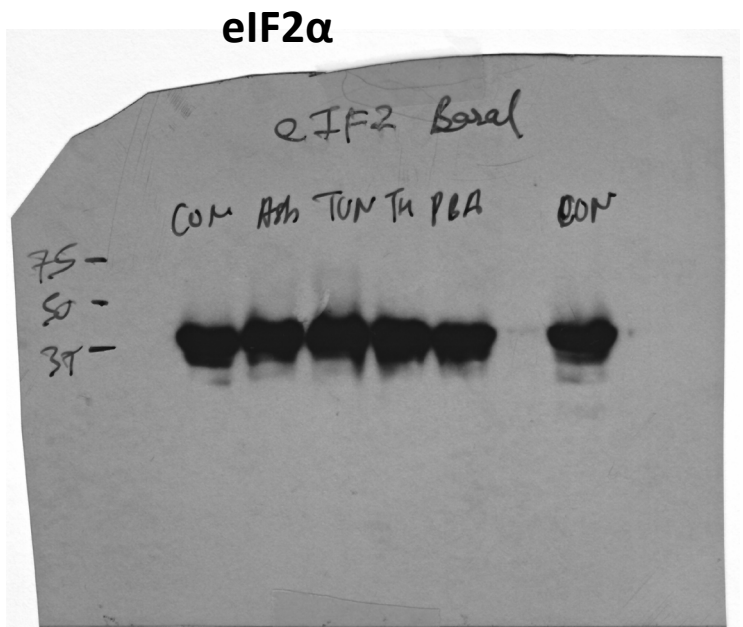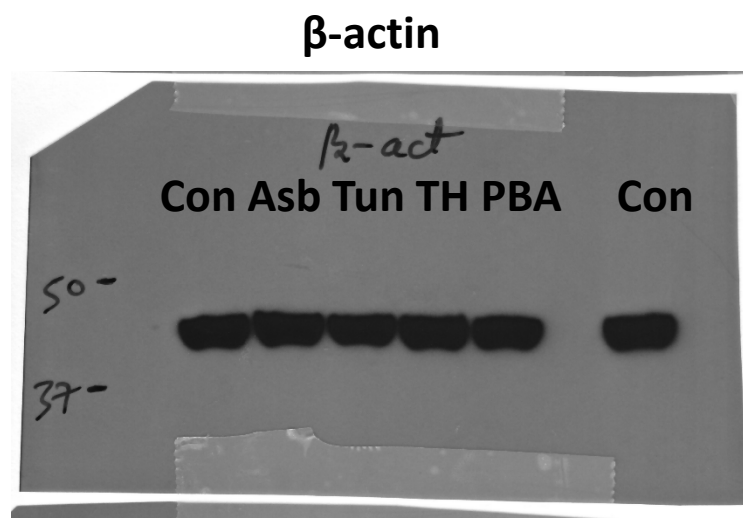

Full unedited gel for Figure 2C Inset

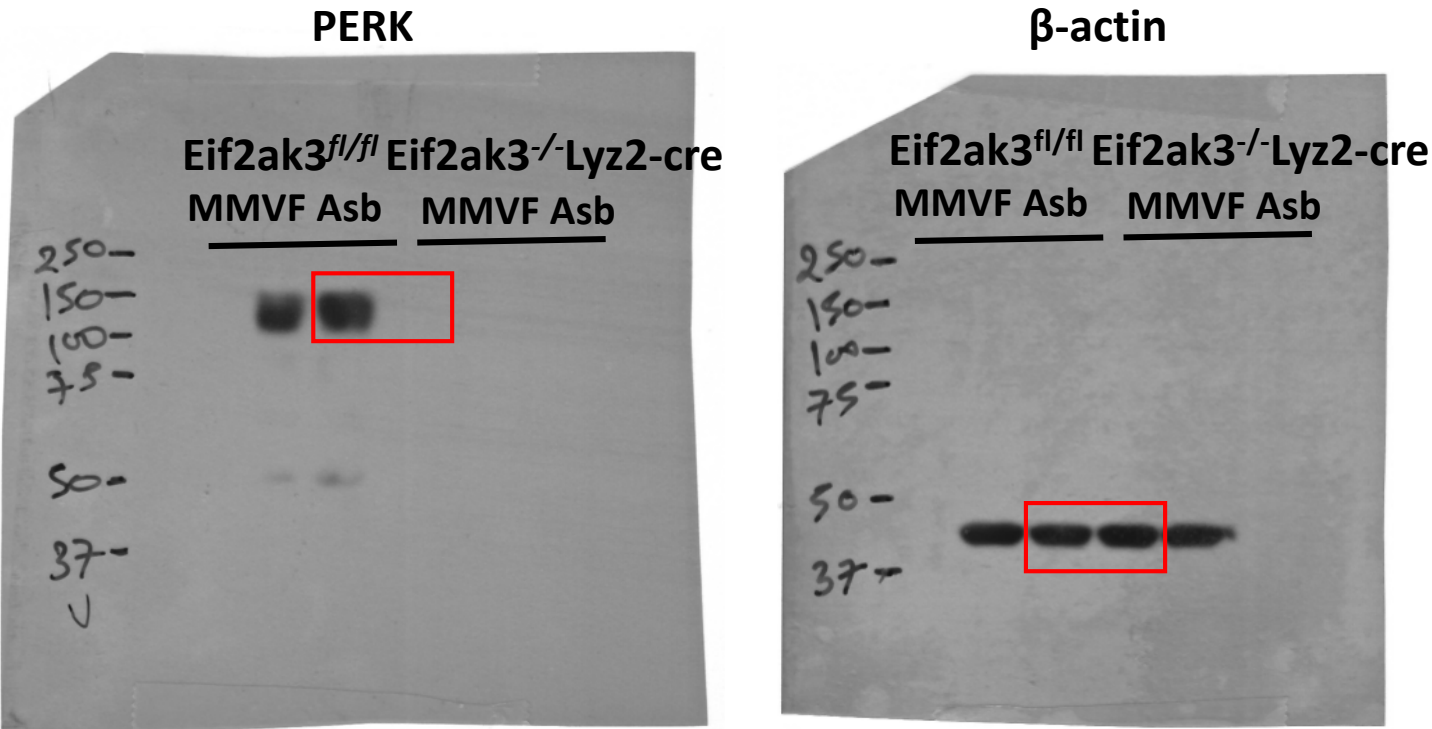

Full unedited gel for Figure 4D

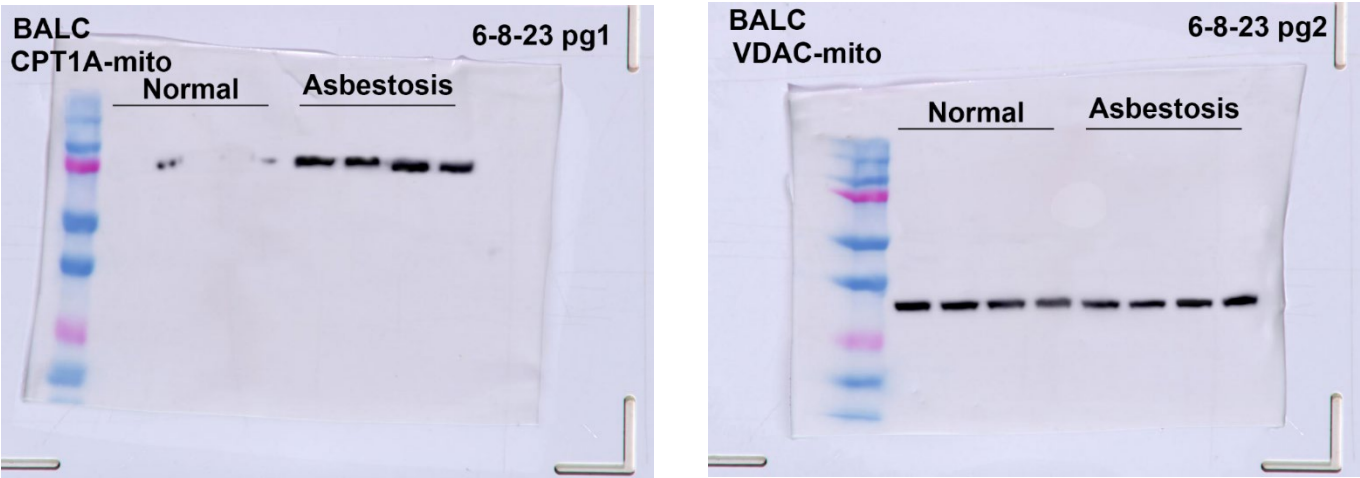



Full unedited gel for Figure 5B, Inset

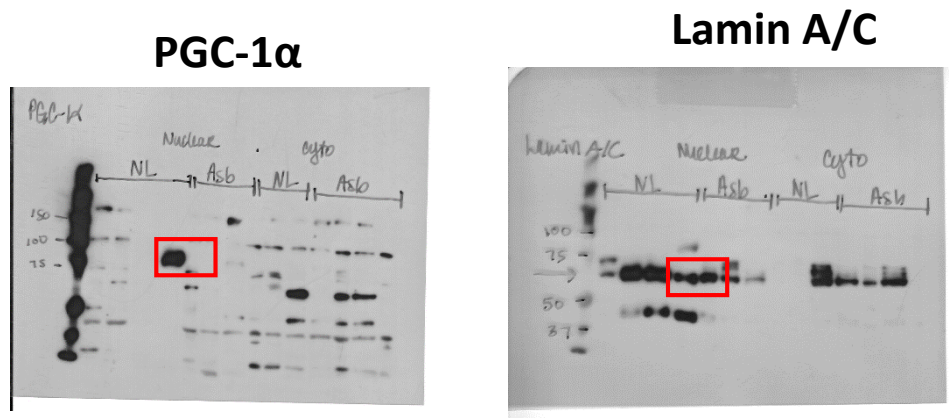

Full unedited gel for Figure 5H, Inset

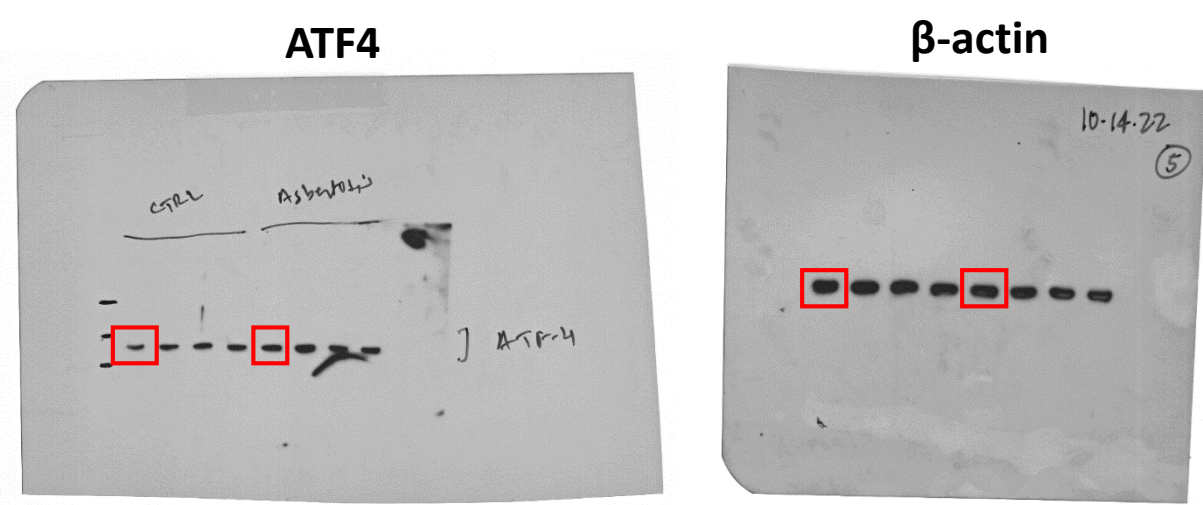

Full unedited gel for Figure 5I, Inset

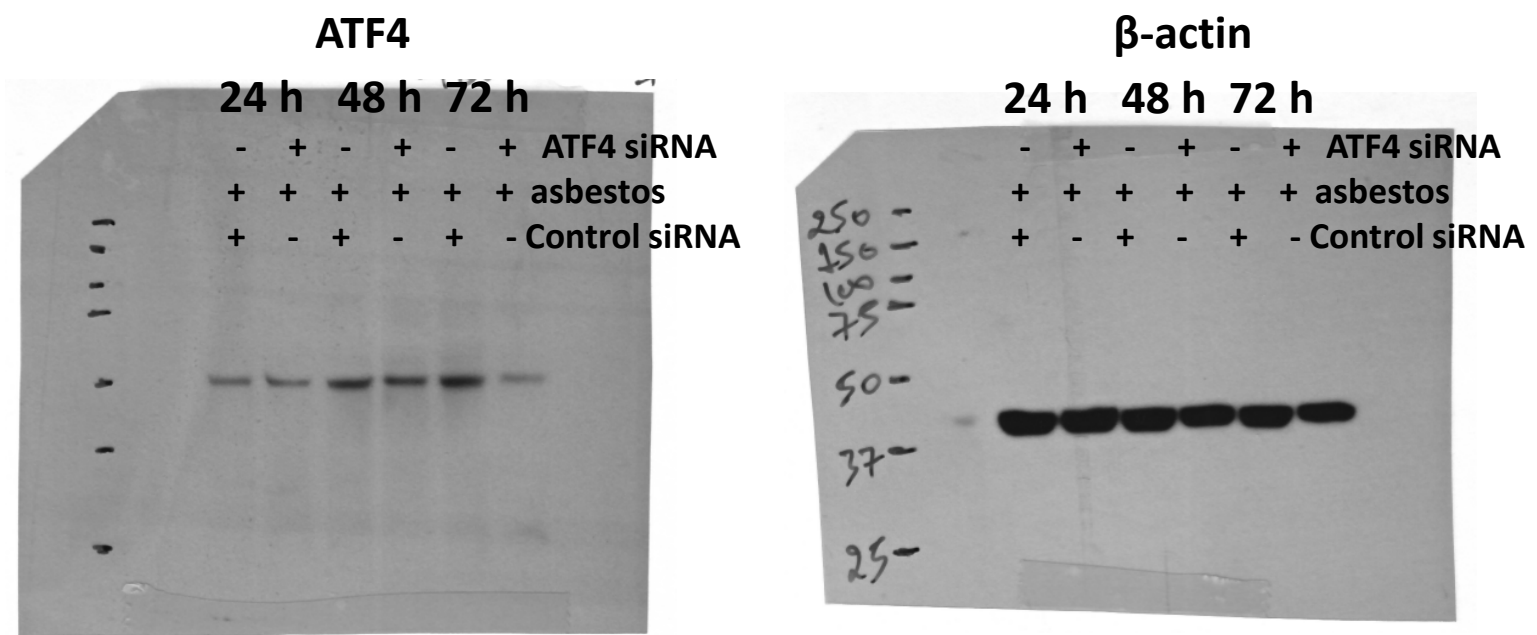

Full unedited gel for Supplemental Figure 1A  
**PERK**

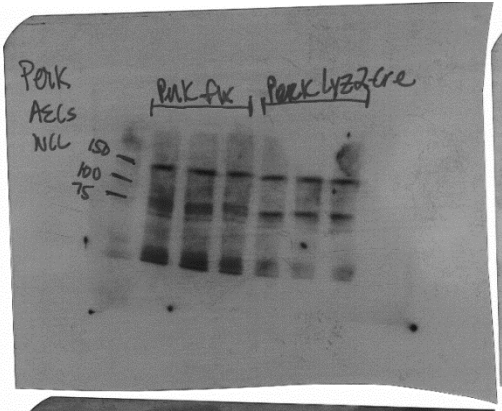

**SPC**

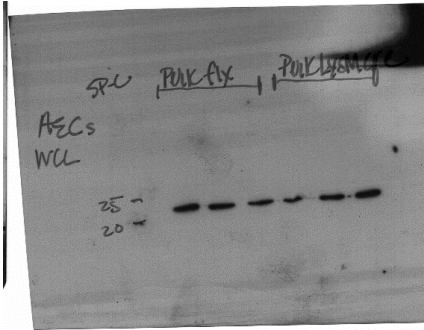

Full unedited gel for Supplemental Figure 4B

**CHOP**

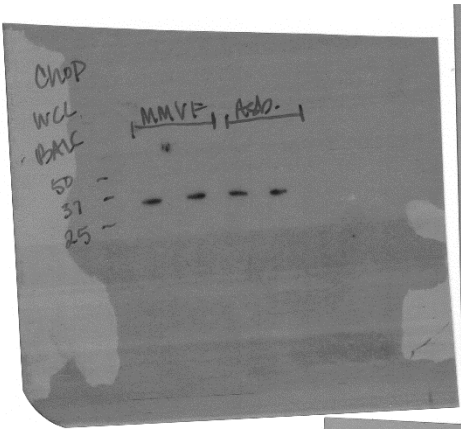

**$\beta$ -actin**

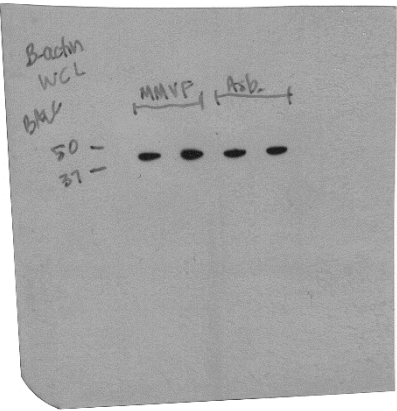

Full unedited gel for Supplemental Figure 4C

**PERK**

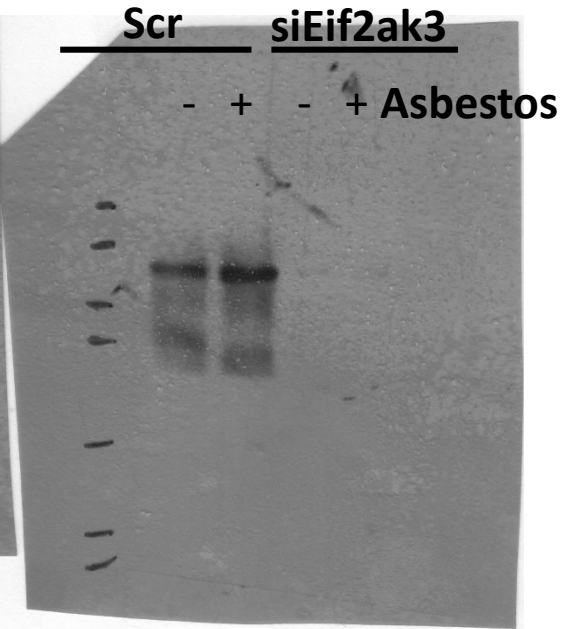

**$\beta$ -actin**

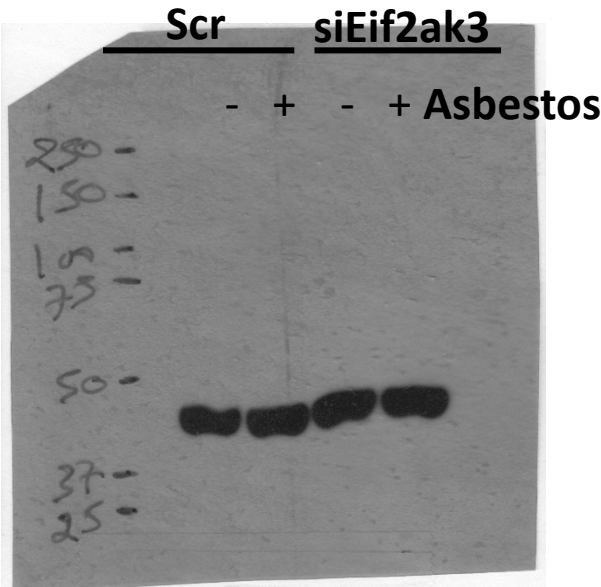

Full unedited gel for Supplemental Figure 4E

**PGC-1 $\alpha$**

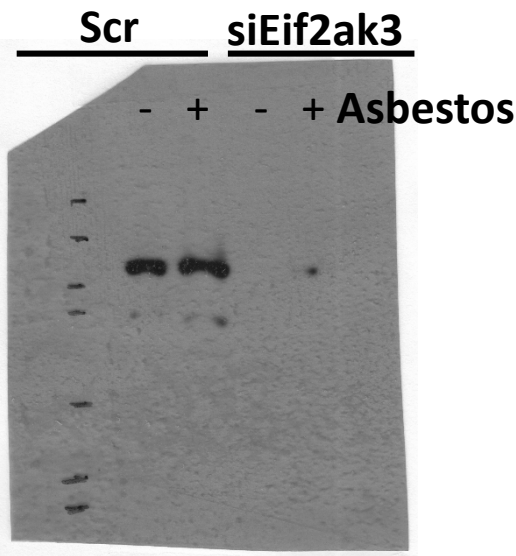

**Lamin A/C**

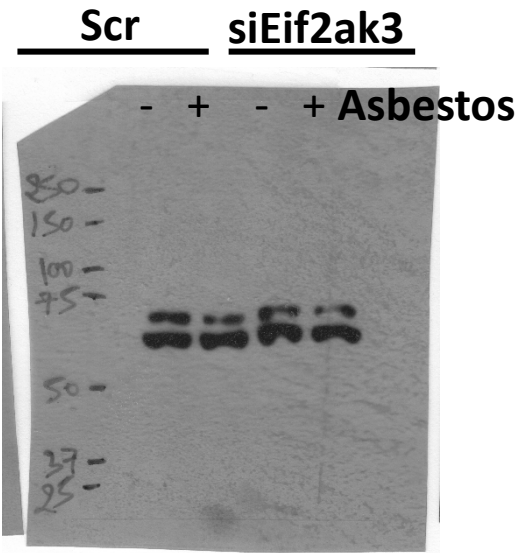

Full unedited gel for Supplemental Figure 5A

p-eIF2 $\alpha$

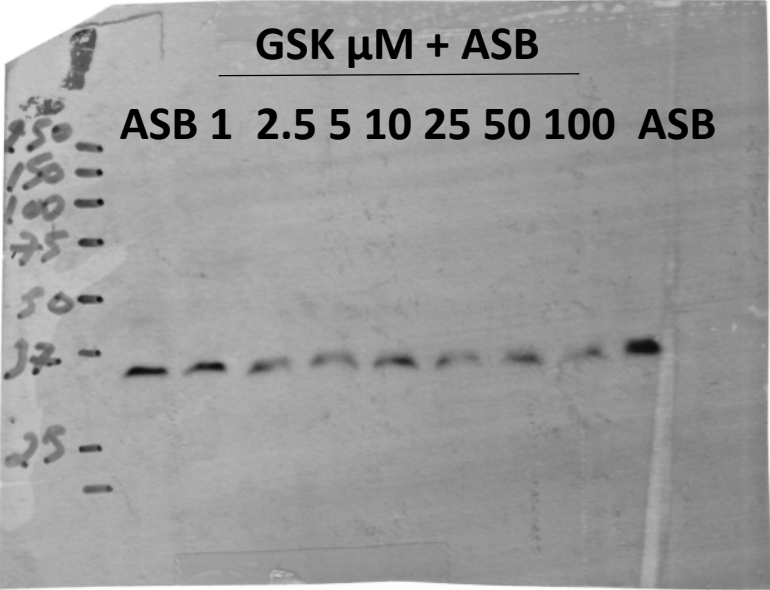

ATF4

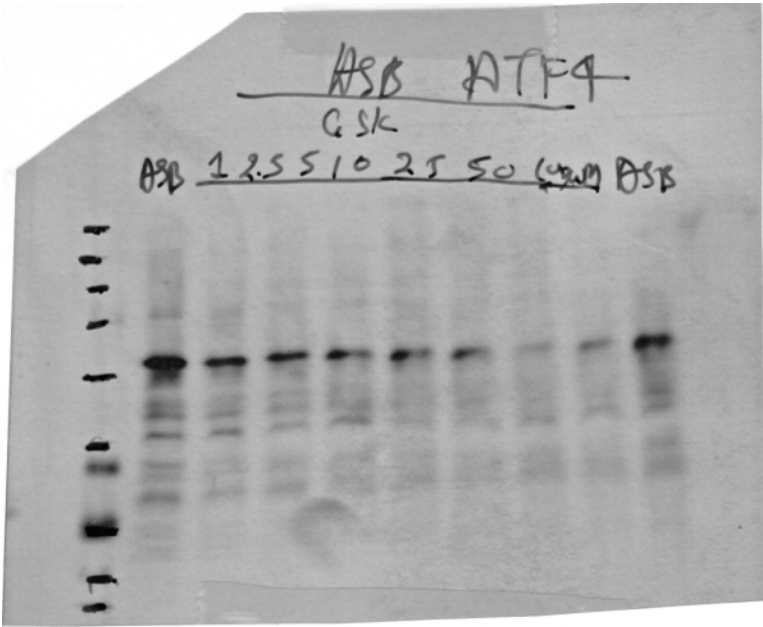

$\beta$ -actin

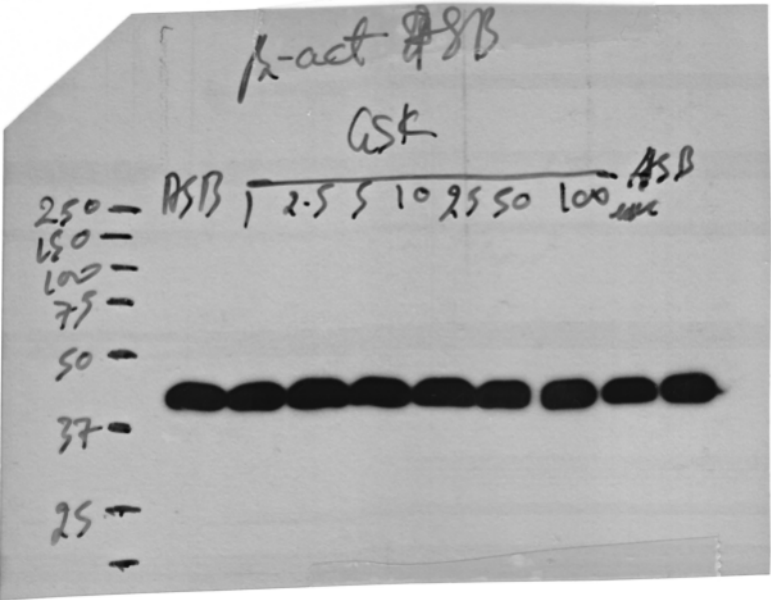



Full unedited gel for Supplemental Figure 5B

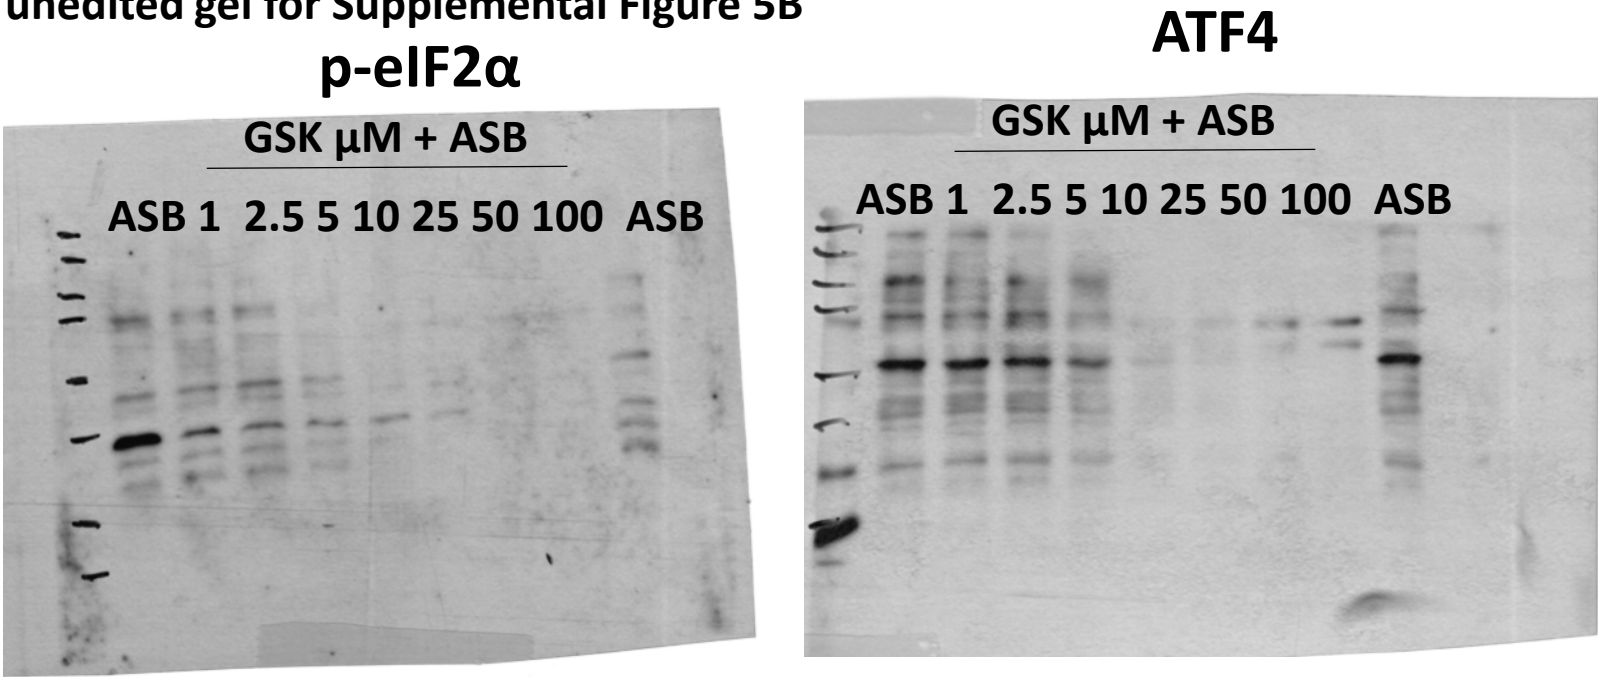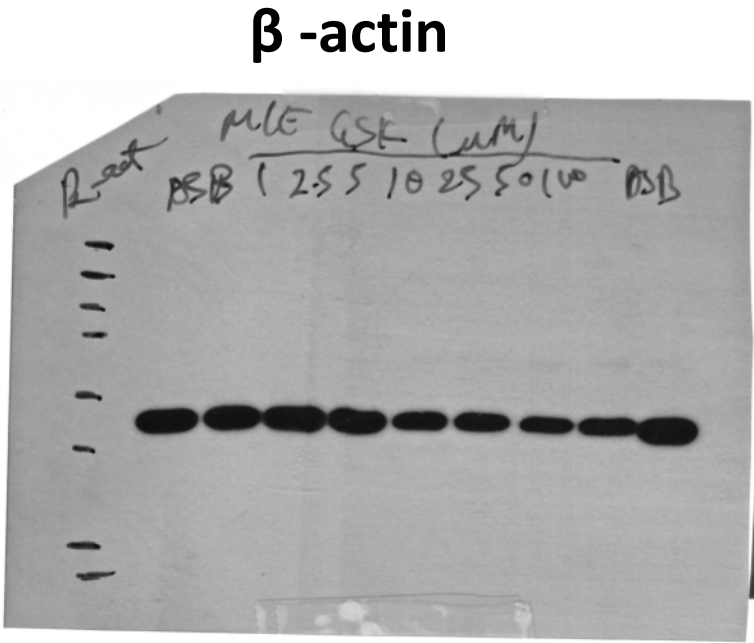

Full unedited gel for Supplemental Figure 5C

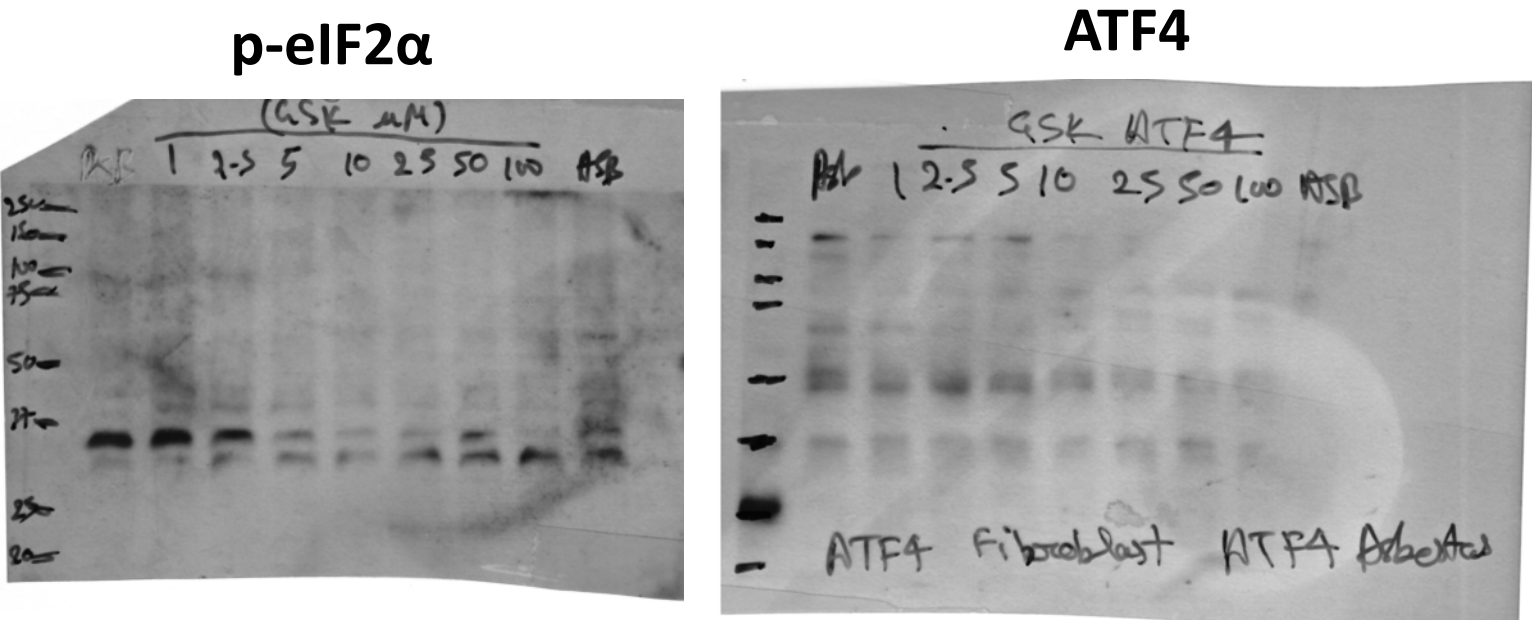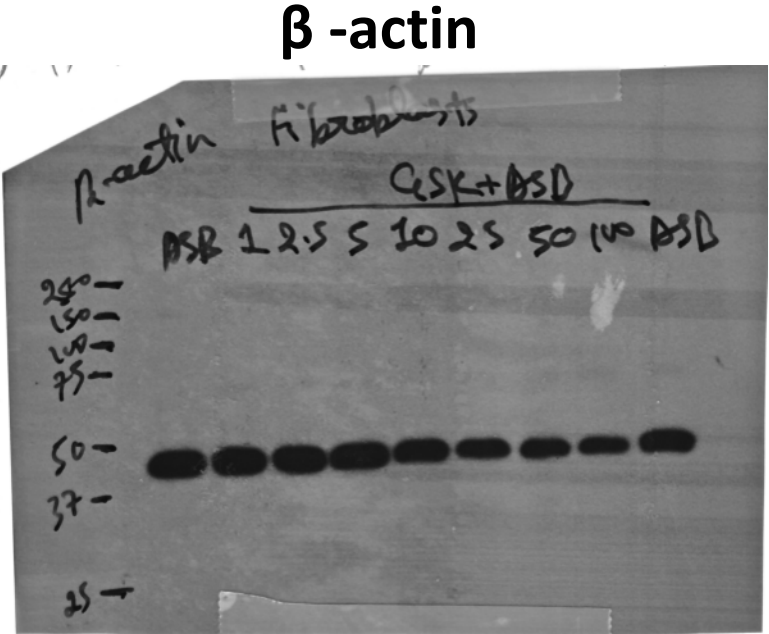

Supplement: sd2 [file 2]
